# Supplementary material for: Dual-specificity Phosphatase 9 protects against Cardiac Hypertrophy by targeting ASK1
Source: PubMed Central journal article supplement (PMC8241718; doi:10.7150/ijbs.57130), 2021-05-27
Supplement: ijbsv17p2193s1.pdf [file ijbsv17p2193s1.pdf]

**Figure S1**

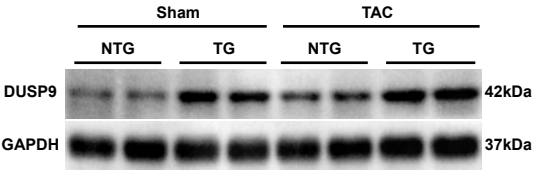

**Supplementary Figure legends:**

Figure S1. Representative western blot results to validate DUSP9 expression in non-transgenic and transgenic mice at four weeks after sham or TAC surgery (n = 4 mice per group)
